# Supplementary material
Source: PubMed Central journal article supplement (PMC3077778)
Supplement: supp_tpc.110.082081_Hwang_Supplemental_Data_Final.pdf [file supp_tpc.110.082081_Hwang_Supplemental_Data_Final.pdf]

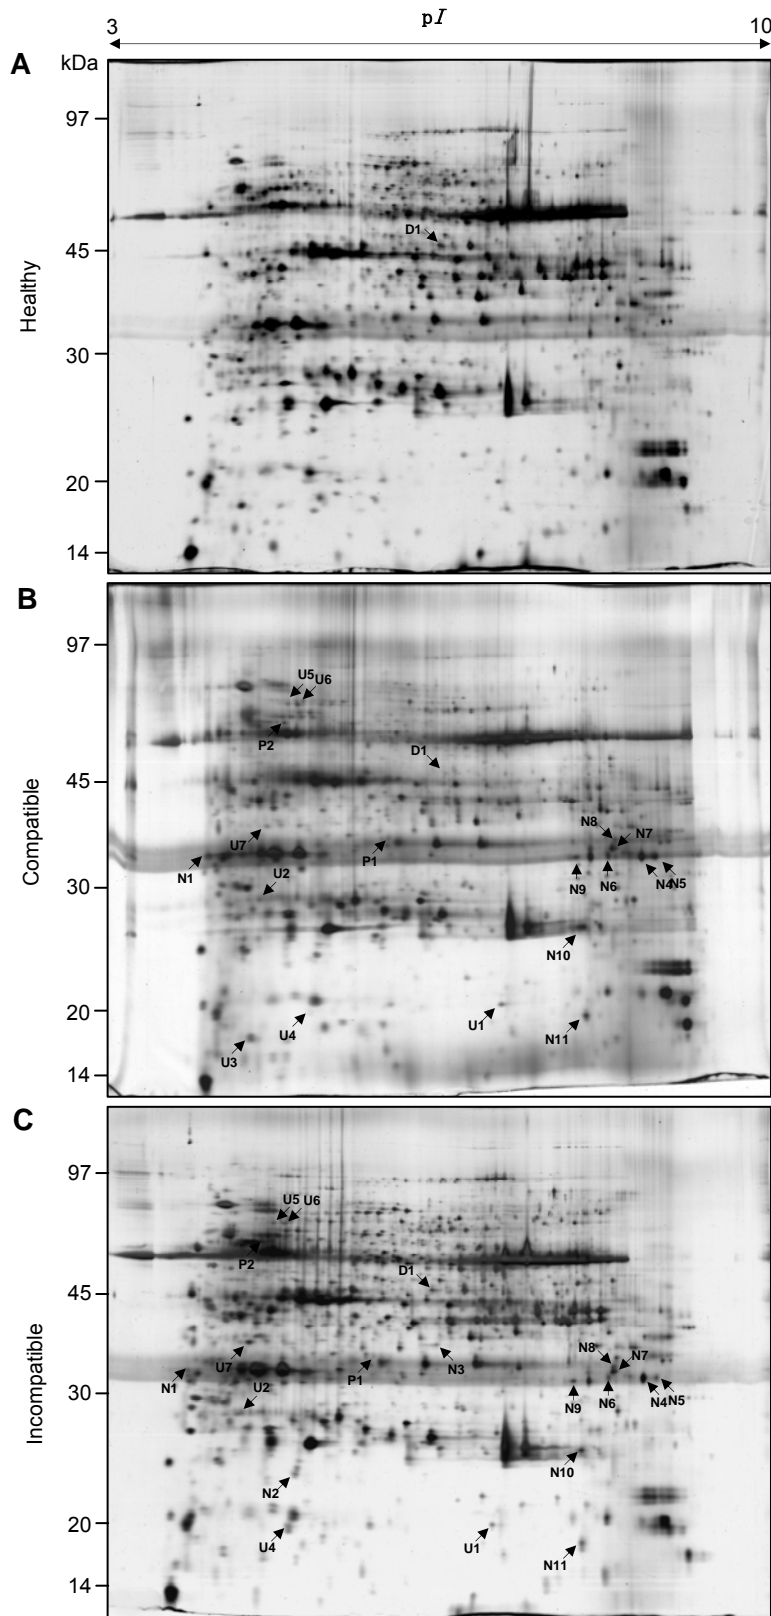

Supplemental Figure 1.

**Supplemental Figure 1.** 2D Gel Images of Proteins in Pepper Leaves Uninfected and Infected by *Xcv*.

Proteins were separated in the first dimension on IPG strips (24 cm, pI 3-10 nonlinear) and in the second dimension on a 12.5% polyacrylamide SDS gel. Differentially expressed proteins are numbered: N1-N11 for newly induced proteins, U1-U7 for upregulated proteins, and D1 for downregulated proteins. These spot numbers are assigned arbitrarily, and are shown in Table 1.

The pI range of the pI gradient strips is shown above the gel images, and the positions of protein molecular weight markers, MW (kDa), are indicated on the left.

**(A)** Proteins in healthy pepper leaves.

**(B and C)** Proteins in pepper leaves 15 h after inoculation with the virulent (compatible) Ds1

**(B)** and avirulent (incompatible) Bv5-4a **(C)** strains of *Xcv*, respectively.

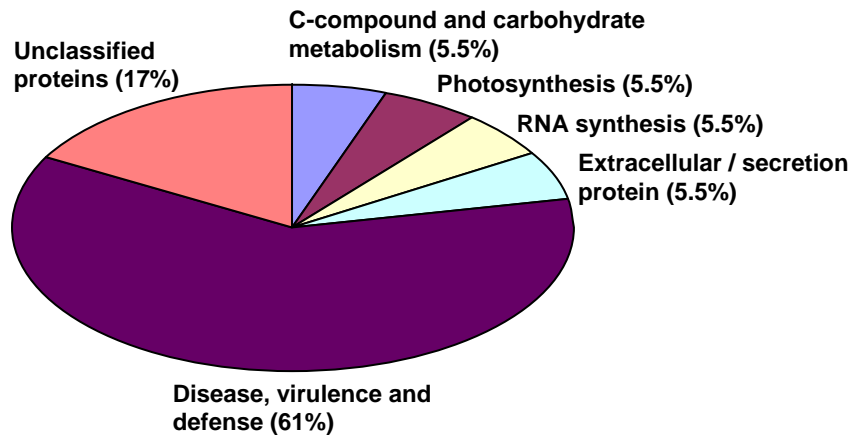

**Supplemental Figure 2.** The Proportion of Proteins that are Differentially Expressed in Pepper Leaves Infected by the DS1 and Bv5-4a Strains of *Xcv*.

Using *Arabidopsis* putative orthologs of identified pepper proteins, these proteins were functionally categorized based on the SOLANACEAE EST Analysis System and the MIPS *Arabidopsis thaliana* genome database (MatDB).

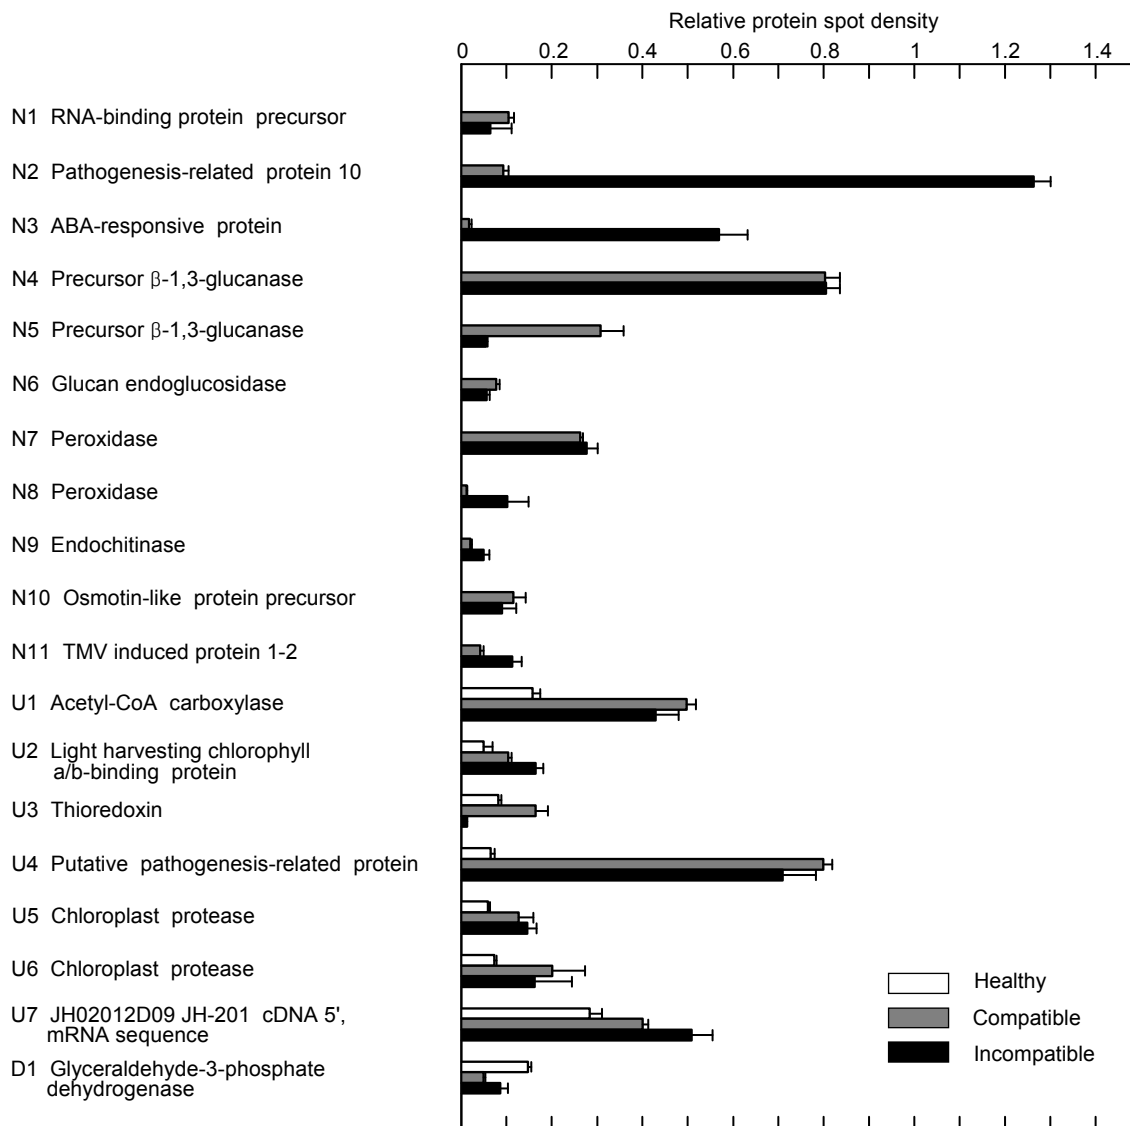

**Supplemental Figure 3.** Relative Protein Expression Changes in Pepper Leaves Infected by *Xcv*.

The changes in protein spots were calculated with ImageMaster™ 2D Platinum 6.0 and are plotted as the relative densities of spots in Supplemental Figure 1. The values are the means  $\pm$  standard deviations of percentage volumes of proteins from three independent experiments.

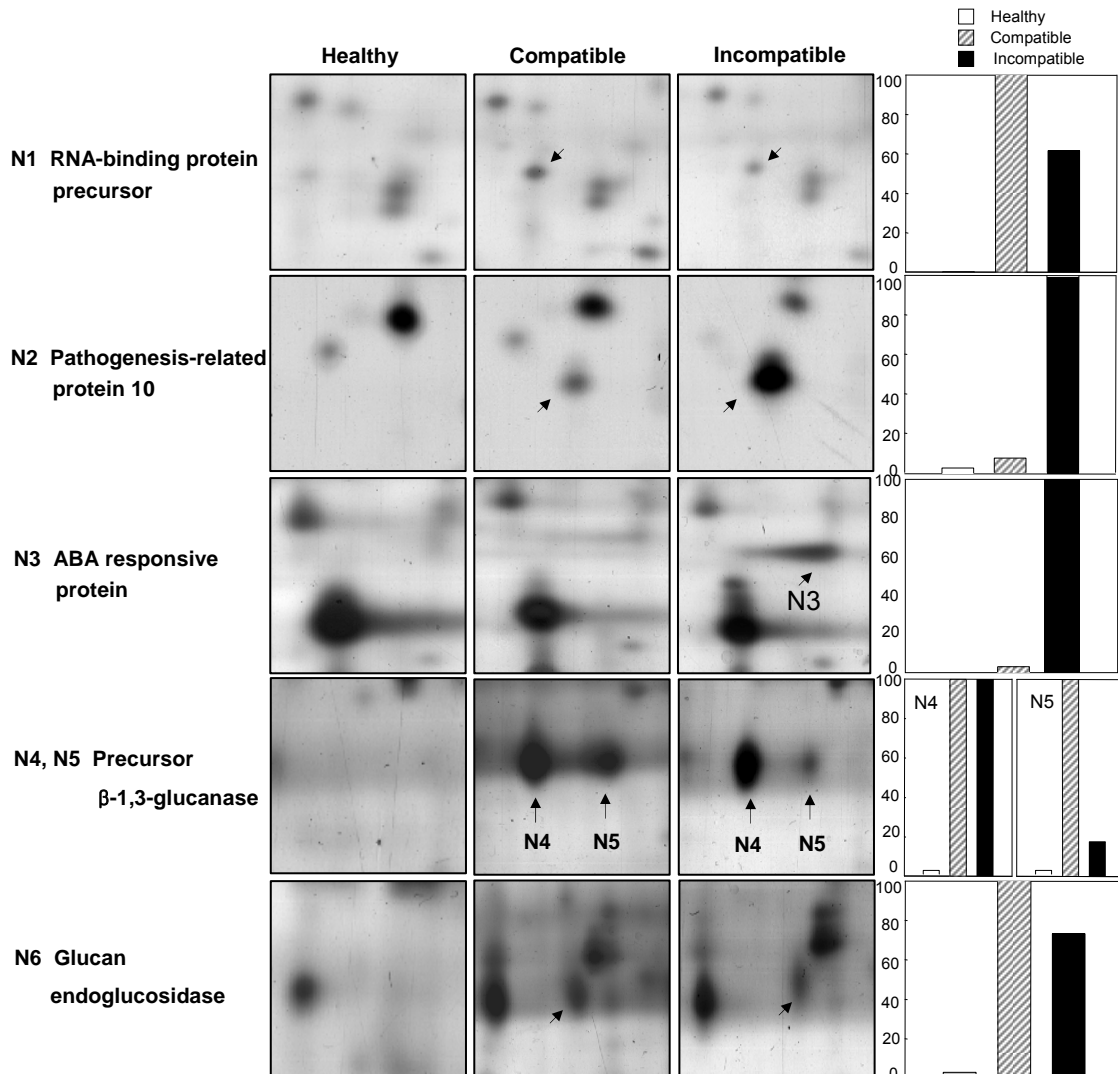

**Supplemental Figure 4.** Differentially Expressed Protein Spots.

The relative intensities of the protein spots are shown at the right. The highest levels are shown as 100.

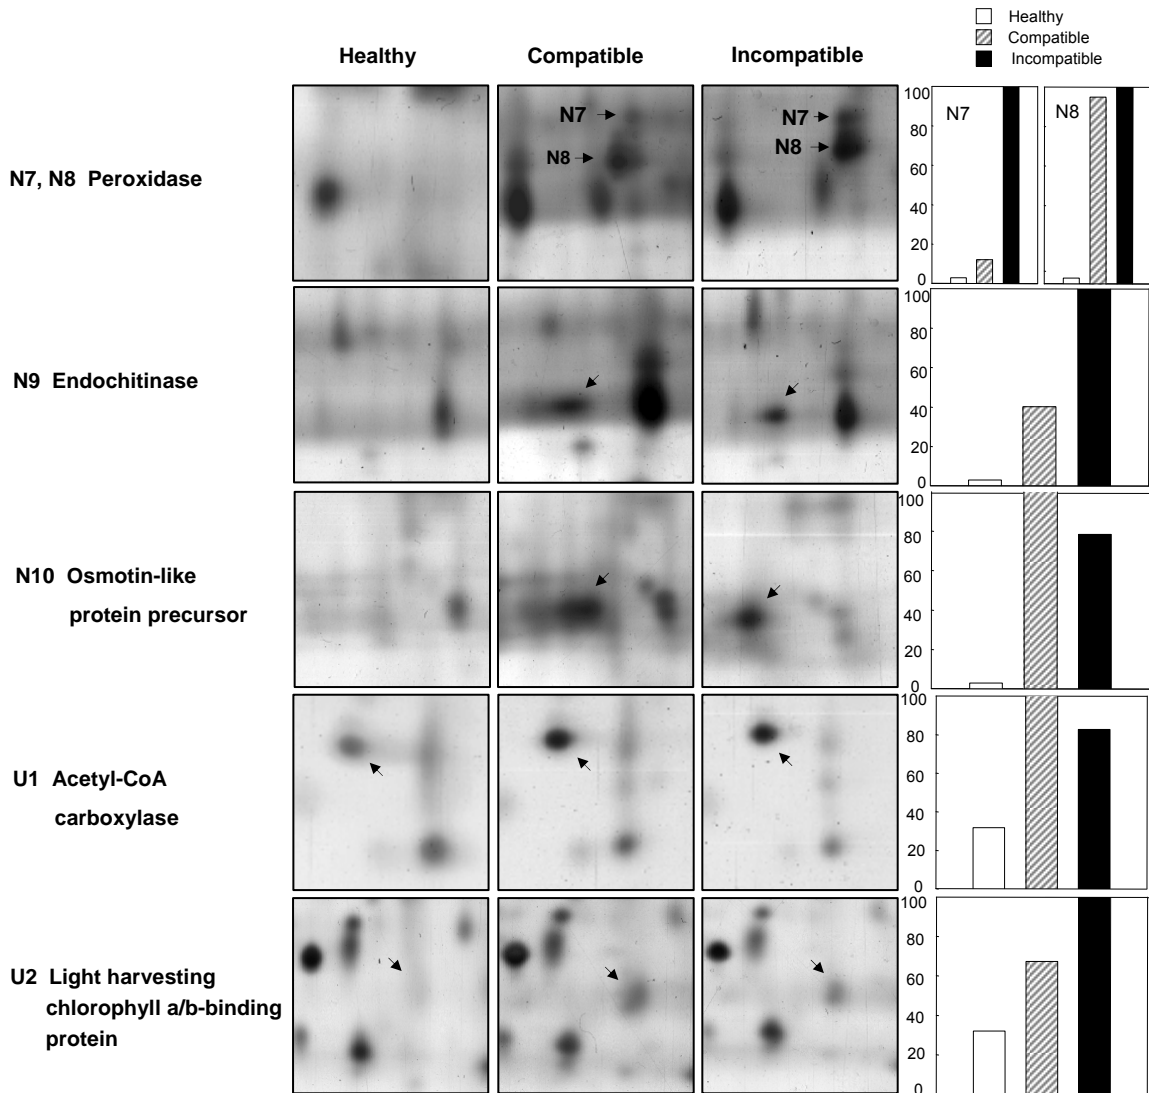

Supplemental Figure 4 (continued).

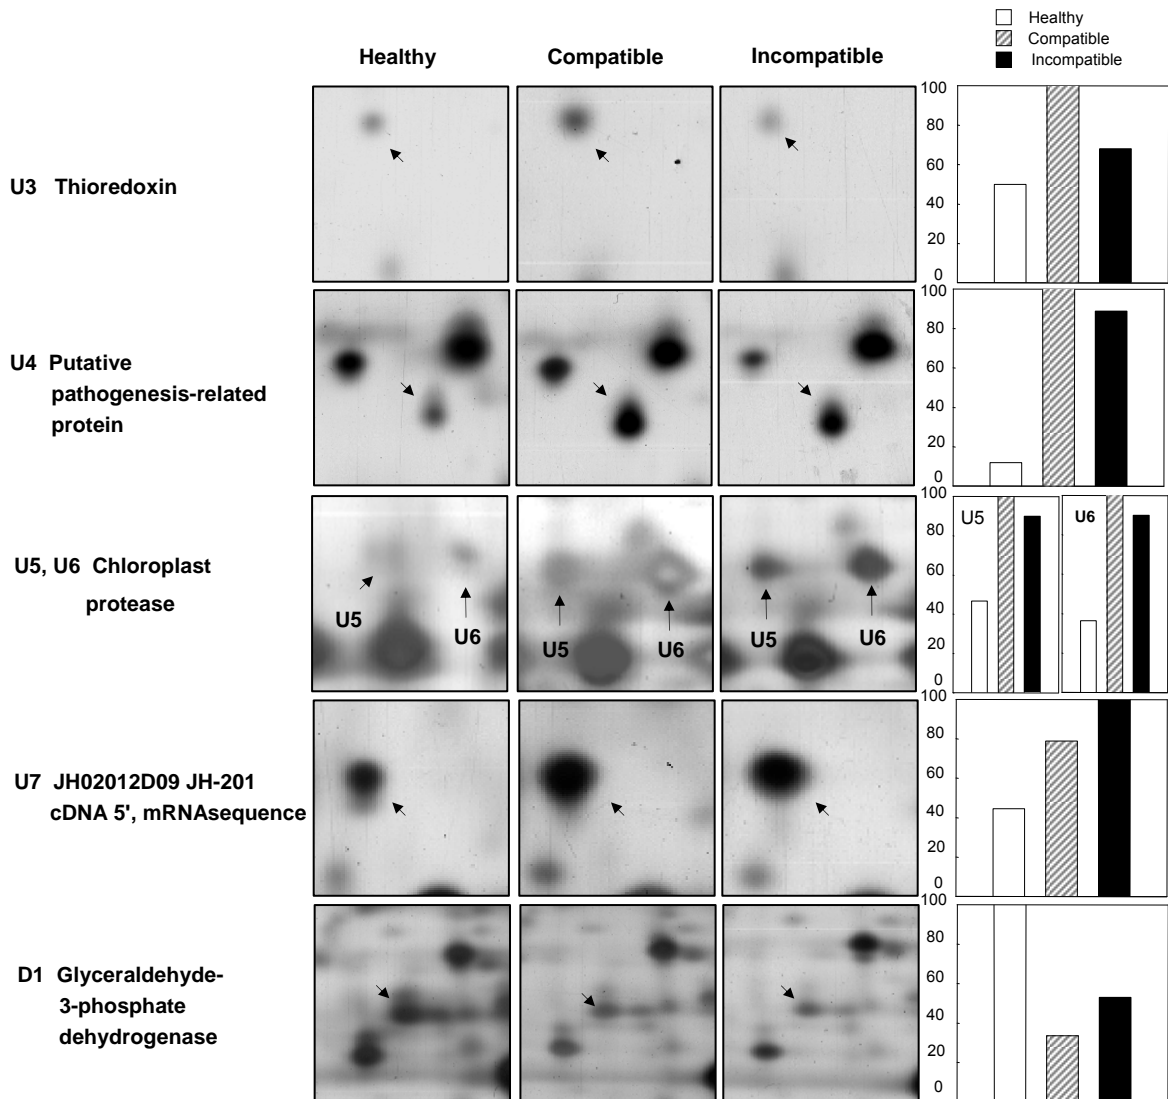

Supplemental Figure 4 (continued).

**A**

```

MTGTTEENQP  KVQSEEPQAP  SIPTSSSSSDE  KEKQPEMDQQ  KWGTHIMGPP
AVPTSHPDNQ  KAAALWRAAD  QKEEFHPQPY  VVYTPVDHRP  TNNPLESVVN
FNSWSNRAET  IARNIWHNLR  TGPSVTEAAW  GKLNLTAKAL  TEGGFEPLYK
QIFSTDPNEQ  LKKTFACTYLS  TTTGPVAGTL  YLSSTKVAFC  SDRPLSFKAP
SGQEAWSYK  VAIPLTNIGT  MNPIVMREN  PERYIQIVTI  DGHDFWFMGF
VNF EKATHHL  LDALSNFKAQ  PPHVGEVPQP  ASN*
    
```

**B**

[gi|25038635](#)      Mass: 13009      Score: 230      Queries matched: 3      Frame: 2  
 KS12040A12 KS12 Capsicum annuum cDNA, mRNA sequence

| Start - End | Observed | Mr(expt)  | Mr(calc)  | Delta  | Miss Sequence      |                 |
|-------------|----------|-----------|-----------|--------|--------------------|-----------------|
| 6 - 17      | 602.3937 | 1202.7729 | 1202.5931 | 0.1798 | 0 R.TGPSVTEAAWGK.L | (Ions score 89) |
| 24 - 35     | 662.9277 | 1323.8408 | 1323.6710 | 0.1698 | 0 K.ALTEGGFEPLYK.Q | (Ions score 49) |
| 84 - 95     | 693.9164 | 1385.8182 | 1385.6251 | 0.1930 | 0 K.APSGQEAWSYK.V  | (Ions score 95) |

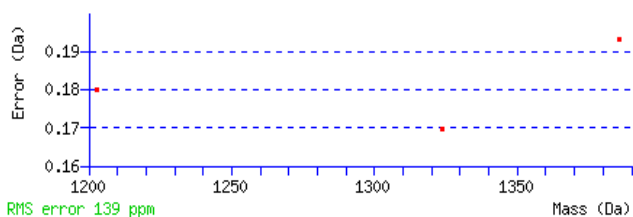

**Probability Based Mowse Score**

Ions score is  $-10 \cdot \log(P)$ , where P is the probability that the observed match is a random event. Individual ions scores > 67 indicate identity or extensive homology ( $p < 0.05$ ). Protein scores are derived from ions scores as a non-probabilistic basis for ranking protein hits.

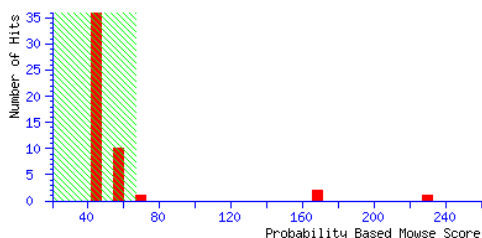

**Supplemental Figure 5.** Identification of ABR1 by LC/MS-MS.

**(A)** The identified peptides and their positions in the ABR1 sequence are marked in yellow. Previously reported EST sequences are underlined.

**(B)** The corresponding peptide list, delta mass error of the observed ions, and the probability based MOWSE (for Molecular Weight Search) score by MASCOT MS/MS ion search (<http://www.matrixscience.com>).



```

cttgaaaatagttttccgcacttaaatcagttaatcATGACAGGCACAACAGAAGAAAAT 60
                                     M T G T T E E N      8
CAACCCAAAGTTCAAGAATCAGAGCCTCAAGCACCTCTATTCTACATCTTCTTCTTCT 120
  Q P K V Q E S E P Q A P S I P T S S S S      28
GATGAGAAAGAGAAAACAACCAGAAATGGATCAACAAAAATGGGGCACACACATAATGGGT 180
  D E K E K Q P E M D Q Q K W G T H I M G      48
CCACCAGCAGTTCCAACAAGTCATCCAGATAATCAGAAAGCTGCTGCGTTATGGAGAGCT 240
  P P A V P T S H P D N Q K A A A L W R A      68
GCAGACCAAAAAGAAGAGTTTCACCCACAGCCTTACGTTGTTTATACTCCAGTTGATCAT 300
  A D Q K E E F H P Q P Y V V Y T P V D H      88
AGGCCTACTAATAATCCACTTGAATCTGTTGTTAATATGTTAATTCTTGGAGTAATCGA 360
  R P T N N P L E S V V N M F N S W S N R      108
GCTGAGACCATCGCCCGCAACATCTGGCATAATCTGAGAAGTGGACCATCAGTGACAGAA 420
  A E T I A R N I W H N L R T G P S V T E      128
GCAGCGTGGGAAAAGCTTAATTTGACAGCCAAGGCCTTAACAGAAGGCGGATTCGAGCCG 480
  A A W G K L N L T A K A L T E G G F E P      148
CTTTACAAGCAGATTTTCTCTACGGACCCTAATGAGCAGCTGAAGAAGACATTTGCTTGT 540
  L Y K Q I F S T D P N E Q L K K T F A C      168
TATCTTTCAACAACACTACTGGTCTGTTGCTGGAACACTCTATTTGTCATCTACTAAGGTT 600
  A F C S D R P L S F K A P S G Q E A W S      208
TACTACAAGGTAGCAATACCATTGACAAACATTGGGACTATGAACCCAATAGTGATGAGA 720
  Y Y K V A I P L T N I G T M N P I V M R      228
GAGAATCCACCAGAGAGGTACATTTCAGATAGTTACAATCGATGGTCATGACTTCTGGTTC 780
  E N P P E R Y I Q I V T I D G H D F W F      248
ATGGGGTTTGTCAATTTTGAGAAAGCAACACATCATCTCCTTGATGCCTTGCTAATTTT 840
  M G F V N F E K A T H H L L D A L S N F      268
AAGGCCAACCTCCTCATGTTGGGGAAGTGCCACAACCAGCTAGTAAGTAgaaaaaatg 900
  K A Q P P H V G E V P Q P A S N *      285
gctctgtcataacttattgggctgcacactgctttactttttctattttctttgtttgtt 960
cctgcattagatatatgtattctctgtatgtatttttattgcaacattattgtattata 1020
cacactgcttttagtttttattttctctgttttaggagattgacatatatactgtctgtatt 1080
tttattgtaacatttttgtatttagactctcgtgtgtatttttattgtaacattattata 1140
ttgtaaaaaaaaaaaaaaaaaaaaaaaaaaaaa 1172

```

**Supplemental Figure 6.** Nucleotide and Deduced Amino Acid Sequences of the Pepper (*Capsicum annuum*) ABA-Responsive Protein (*ABR1*) Gene cDNA.

The nucleotide and amino acid residues are numbered at the right. The initiation codon is indicated in bold and the termination codon is indicated by an asterisk (\*). The gray box represents the GRAM domain present in glucosyltransferases, myotubularin and other putative membrane-associated proteins.

**A**

|                          |                                                                |              |     |
|--------------------------|----------------------------------------------------------------|--------------|-----|
| ABR1                     | KTETTEE-----                                                   | NCNK         | 11  |
| Grapevine (XP_002263365) | KTETSEDPQHQQSP-----                                            | PSPR         | 19  |
| Grapevine (XP_002263309) | KTETSKG-----QSP-----                                           | PSPK         | 14  |
| Arabidopsis (NP_196824)  | KTETSQED-----                                                  | QPK          | 10  |
| Rice (ABA98234)          | LDGKDSITTP-APAP-----APAP-----                                  | APAA         | 23  |
| Barley (AAD09343)        | LDGKGYTTPPTAPAPQAEAGAPHFYPPTEHGTAPOPGSQSVYPPMPKAMDGQDAAPACGG   | CGG          | 60  |
|                          |                                                                |              |     |
| ABR1                     | VQESE-----                                                     | MDQQRWGHV    | 47  |
| Grapevine (XP_002263365) | AKESD-----                                                     | DAKRWGTHV    | 52  |
| Grapevine (XP_002263309) | AKESD-----                                                     | DTKRWGTHV    | 43  |
| Arabidopsis (NP_196824)  | IITDQ-----                                                     | QDKRWGTHV    | 44  |
| Rice (ABA98234)          | AEPQT-----                                                     | QPEAKRWGTRQY | 54  |
| Barley (AAD09343)        | APHPSSPLTQQAMELEGKYAAPQPGTGATPSPLTQQAVDGGKDAAPTPPAESARWGTTRQY  | TRQY         | 120 |
|                          |                                                                |              |     |
| ABR1                     | EPPAVPTVHPDNDK-AALWRADRHQHTYH-QPWVQVSPVE-KPS-----              | NNFFE        | 96  |
| Grapevine (XP_002263365) | EPPAVPTVHPDNDK-AALWRADRHQHTYH-QPWVQVSPVE-KPS-----              | NNFFE        | 98  |
| Grapevine (XP_002263309) | EPPAVPTVHPDNDK-AALWRADRHQHTYH-QPWVQVSPVE-KPS-----              | NNFFE        | 88  |
| Arabidopsis (NP_196824)  | EPPAVPTVHPDNDK-AALWRADRHQHTYH-QPWVQVSPVE-KPS-----              | NNFFE        | 91  |
| Rice (ABA98234)          | EPPAVPTVHPDNDK-AALWRADRHQHTYH-QPWVQVSPVE-KPS-----              | RRPERGDS     | 107 |
| Barley (AAD09343)        | EPPAVPTVHPDNDK-AALWRADRHQHTYH-QPWVQVSPVE-KPS-----              | RRPERGDS     | 177 |
|                          |                                                                |              |     |
| ABR1                     | SVVNM-INSVSNFAETIARRLWLNKMGHVSSETAWGRVNLAKAITEGGFESLYKCTEA-    | YKCTEA-      | 155 |
| Grapevine (XP_002263365) | PVIHTFNSVSRKAETIARRLWLNKMGHVSSETAWGRVNLAKAITEGGFESLYKCTEA-     | YKCTEA-      | 157 |
| Grapevine (XP_002263309) | PVIHTFNSVSRKAETIARRLWLNKMGHVSSETAWGRVNLAKAITEGGFESLYKCTEA-     | YKCTEA-      | 147 |
| Arabidopsis (NP_196824)  | PVIHTFNSVSRKAETIARRLWLNKMGHVSSETAWGRVNLAKAITEGGFESLYKCTEA-     | YKCTEA-      | 150 |
| Rice (ABA98234)          | HILDFNTVSRKAETELSSVWLNKMGHVSSETAWGRVNLAKAITEGGFESLYKCTEA-      | YKCTEA-      | 167 |
| Barley (AAD09343)        | HILDFNTVSRKAETELSSVWLNKMGHVSSETAWGRVNLAKAITEGGFESLYKCTEA-      | YKCTEA-      | 236 |
|                          |                                                                |              |     |
| ABR1                     | TDPN=QLKRLKTFACVLSSTIGPVAGTLVLSSTKVAFCSDRFLSFAAPSGCTAWSYKWKMI  | YKWKMI       | 215 |
| Grapevine (XP_002263365) | TDPN=QLKRLKTFACVLSSTIGPVAGTLVLSSTKVAFCSDRFLSFAAPSGCTAWSYKWKMI  | YKWKMI       | 217 |
| Grapevine (XP_002263309) | TDPN=QLKRLKTFACVLSSTIGPVAGTLVLSSTKVAFCSDRFLSFAAPSGCTAWSYKWKMI  | YKWKMI       | 207 |
| Arabidopsis (NP_196824)  | TDPN=QLKRLKTFACVLSSTIGPVAGTLVLSSTKVAFCSDRFLSFAAPSGCTAWSYKWKMI  | YKWKMI       | 210 |
| Rice (ABA98234)          | AGAD=RLKRLKTFACVLSSTIGPVAGTLVLSSTKVAFCSDRFLSFAAPSGCTAWSYKWKMI  | YKWKMI       | 227 |
| Barley (AAD09343)        | SGPDE=HVKRLKTFACVLSSTIGPVAGTLVLSSTKVAFCSDRFLSFAAPSGCTAWSYKWKMI | YKWKMI       | 296 |
|                          |                                                                |              |     |
| ABR1                     | LINIGTVMNIVMHNPPFVYIQLITDGHDFWFMGFVNFYFKATHHLLUALSNFKALPPHY    | 27/5         |     |
| Grapevine (XP_002263365) | LGNIGTVNIVMHNPPFVYIQLITDGHDFWFMGFVNFYFKATHHLLUALSNFKALPPHY     | 277          |     |
| Grapevine (XP_002263309) | LGNIGTVNIVMHNPPFVYIQLITDGHDFWFMGFVNFYFKATHHLLUALSNFKALPPHY     | 264          |     |
| Arabidopsis (NP_196824)  | LANVATVNVVYKTEPPKVIQLITDGHDFWFMGFVNFYFKATHHLLUALSNFKALPPHY     | 270          |     |
| Rice (ABA98234)          | YAKVAAAETVMKESPPKVIYVHYVYDSDHDFWFMGFVNFYFKATHHLLUALSNFKALPPHY  | 287          |     |
| Barley (AAD09343)        | LAKLAAVETVMKESPPKVIYVHYVYDSDHDFWFMGFVNFYFKATHHLLUALSNFKALPPHY  | 326          |     |
|                          |                                                                |              |     |
| ABR1                     | GEVQPASN--                                                     | 284          |     |
| Grapevine (XP_002263365) | RPVAGASS--                                                     | 285 (66%)    |     |
| Grapevine (XP_002263309) | -----                                                          | 264 (65%)    |     |
| Arabidopsis (NP_196824)  | SG-----                                                        | 272 (63%)    |     |
| Rice (ABA98234)          | DTAAAVPGDGK                                                    | 298 (57%)    |     |
| Barley (AAD09343)        | -----                                                          | 326 (51%)    |     |

**B**

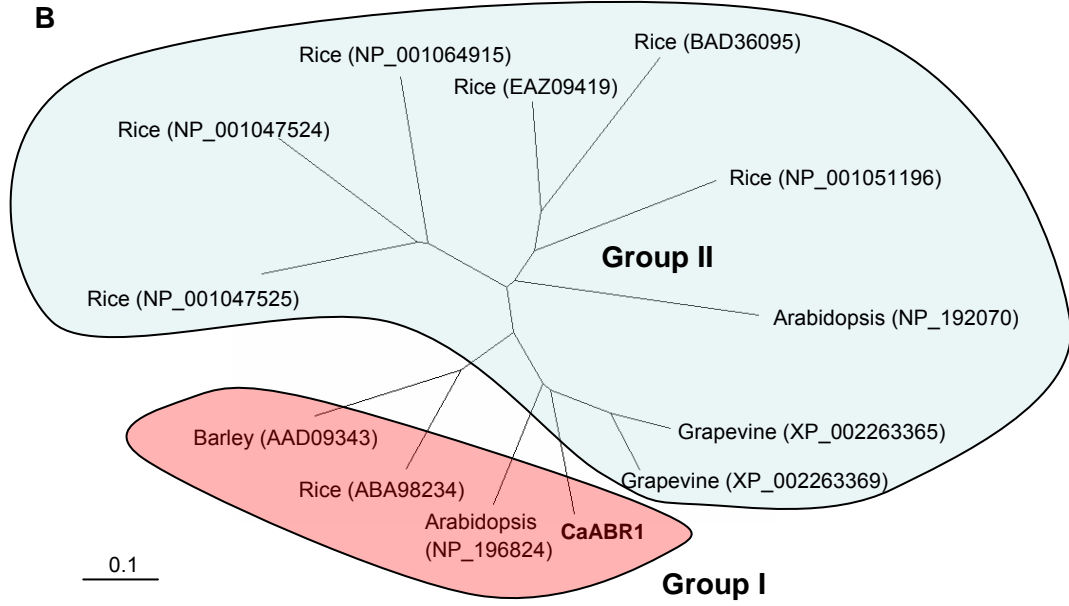

**Supplemental Figure 7.** Comparison of ABR1 with Other ABA-Responsive Proteins.

**(A)** Comparison of the deduced amino acid sequences of pepper (*Capsicum annuum*) ABA-responsive protein (ABR1) with those of grapevine unidentified protein products, *Arabidopsis* ABA-responsive protein, rice ABA-responsive protein, and barley ABA-responsive protein (Liu et al., 1999). Gaps introduced for optimal alignment are indicated by hyphens (-). The numbers at the right refer to amino acid residue positions.

**(B)** Phylogenetic analysis of ABR1 and related plant ABA-responsive protein homologs. The unit at the bottom of the tree indicates the number of substitution events. Group I, ABA-responsive proteins; Group II, unidentified proteins.

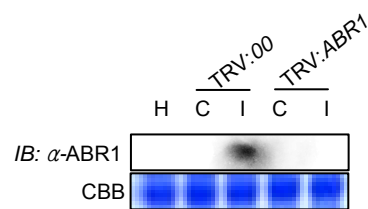

**Supplemental Figure 8.** Immunoblot analysis of Expression of ABR1 in Leaves of Empty Vector (TRV:00) and *ABR1*-Silenced (TRV:ABR1) Pepper Plants.

Total proteins were extracted 24 h after infection by *Xcv*. *H*: Healthy, *C*: Compatible, *I*: Incompatible, CBB: Coomassie brilliant blue.

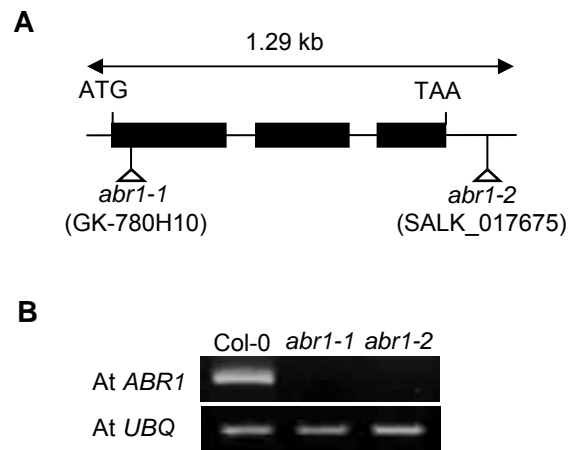

**Supplemental Figure 9.** T-DNA Insertion Sites and Expression of *Arabidopsis* ABA-Responsive Protein-Like *At ABR1*.

**(A)** T-DNA insertion sites in *At ABR1*.

**(B)** RT-PCR analysis of expression of *At ABR1* in the *abr1-1* and *abr1-2* mutants.

Supplemental Table 1. Pathogen Proteins Newly Expressed in Pepper Leaves Infected by Virulent (compatible) Strain Ds1 and Avirulent (incompatible) Strain Bv5-4a of *Xanthomonas campestris* pv. *vesicatoria*

| Spot number | Protein (organism)                                                                                                                      | Accession number | Experimental pI/MW(kDa) | Theoretical pI/MW(kDa) | SC (%) <sup>a</sup> | MS used for identification |
|-------------|-----------------------------------------------------------------------------------------------------------------------------------------|------------------|-------------------------|------------------------|---------------------|----------------------------|
| P1          | Cation/multidrug efflux pump<br>( <i>Magnetospirillum magnetotacticum</i> MS-1)                                                         | ZP_00055164      | 5.77 / 38               | 6.4 / 93.21            | 13                  | MALDI-TOF                  |
| P2          | 60 kDa chaperonin<br>( <i>Xanthomonas axonopodis</i> pv. <i>citri</i> strain 306)                                                       | AAM35431         | 5.04 / 66               | 5.0 / 57.15            | 33                  | MALDI-TOF                  |
| P3          | Distinct helicase family with a unique C-terminal domain including a metal-binding cysteine cluster<br>( <i>Magnetococcus</i> sp. MC-1) | ZP_00291359      | 4.71 / 42               | 5.7 / 187.88           | 10                  | MALDI-TOF                  |

<sup>a</sup> SC: Sequence coverage.

Supplemental Table 2. Gene-Specific Primers for qRT-PCR Used in This Study

| Gene            | Forward and reverse primers                                              |
|-----------------|--------------------------------------------------------------------------|
| <i>18S rRNA</i> | F:5'-TATGGTGTGCACCGGTCGTCTCGT-3'<br>R:5'-GCAGTTGTTTCGTCTTTCATAAATCCAA-3' |
| <i>CaABR1</i>   | F:5'-ATGACAGGCACAACAGAAGAAAAT-3'<br>R:5'-AATAAGTTATGACAGAGCCATTTT-3'     |
| <i>CaBPR1</i>   | F:5'-CAGGATGCAACACTCTGGTGG-3'<br>R:5'-ATCAAAGGCCGTTGGTC-3'               |
| <i>CaPO2</i>    | F:5'-ATGGCAGAGAAAACCACCAGCA-3'<br>R:5'-TCAAAAAAAGTGACCTCCTTTCTGT-3'      |
| <i>CaSAR82</i>  | F:5'-CAGGGAGATGAATTCTGAGGC-3'<br>R:5'-CATATGAACCTCTATGGATTTCTG-3'        |

Supplemental Table 3. Primers for Generation of GFP Fusion Constructs Used in This Study.

| Gene                         | Forward and reverse primers                                                |
|------------------------------|----------------------------------------------------------------------------|
| <i>CaABR1</i>                | F:5'-TCTAGAATGACAGGCACAACAGAAGAA-3'<br>R:5'-GGATCCAATAAGTTATGACAGAGCC-3'   |
| <i>CaABR1<sup>N</sup></i>    | F:5'-TCTAGAATGACAGGCACAACAGAAGAA-3'<br>R:5'-GGATCCCTCGAATCCGCCTTC-3'       |
| <i>CaABR1<sup>GRAM</sup></i> | F:5'-TCTAGAATGCCGCTTTACAAGCAG-3'<br>R:5'-GGATCCCACTATTGGGTTTCATAGTCC-3'    |
| <i>CaABR1<sup>C</sup></i>    | F:5'-TCTAGAATGAGAGAGAATCCACCAGAG-3'<br>R:5'-GGATCCAATAAGTTATGACAGAGCC-3'   |
| <i>CaABR1<sup>ΔC</sup></i>   | F:5'-TCTAGAATGACAGGCACAACAGAAGAA-3'<br>R:5'-GGATCCCACTATTGGGTTTCATAGTCC-3' |
| <i>CaABR1<sup>ΔN</sup></i>   | F:5'-TCTAGAATGCCGCTTTACAAGCAG-3'<br>R:5'-GGATCCAATAAGTTATGACAGAGCC-3'      |
